# Supplementary material
Source: Royal Society of Chemistry journal article supplement (doi:10.1039/d6ma00426a)
Supplement: d6ma00426a1.pdf [file d6ma00426a1.pdf]

## Supplementary Material

### Novel perylene-bridged polyethyleneimine polymer networks: synthesis and photophysical–electrochemical insights for supercapacitor applications

Huriye Icil<sup>a,\*</sup>, Pelin Karsili<sup>a</sup>, Meltem Dinleyici<sup>a</sup>, Jahan Tohtayeva<sup>b</sup>, Sinem Altınışık<sup>c</sup>, Sermet Koyuncu<sup>c,\*</sup>

<sup>a</sup>Department of Chemistry, Faculty of Arts and Sciences, Eastern Mediterranean University, 99628, Famagusta, N. Cyprus, Mersin 10, Turkey

<sup>b</sup>Department of Energy Resources and Management, Canakkale Onsekiz Mart University, 17100, Canakkale, Turkey

<sup>c</sup>Department of Chemical Engineering, Faculty of Engineering, Canakkale Onsekiz Mart University, 17100, Canakkale, Turkey

\* Corresponding authors.

---

 [orcid.org/0000-0002-3389-6734](https://orcid.org/0000-0002-3389-6734); *E-mail address*: [huriye.icil@emu.edu.tr](mailto:huriye.icil@emu.edu.tr) (H. Icil)

#### Contents

**Fig. S1** Synthetic pathway for the preparation of PEI-3 and PEI-5.

**Fig. S2** FTIR spectra of (a) compound 1, perylene-3,4,9,10-tetracarboxylic dianhydride (PDA), (b) compound 2, PEI 60 kDa, and (c) PEI-3, the perylene-cross-linked PEI 60 kDa network.

**Fig. S3** FTIR spectra of (a) compound 1, perylene-3,4,9,10-tetracarboxylic dianhydride (PDA), (b) compound 4, PEI 25 kDa, and (c) PEI-5, the perylene-cross-linked PEI 25 kDa network.

**Fig. S4** <sup>1</sup>H NMR spectrum of compound 2, PEI 60 kDa, in DMSO-d<sub>6</sub>.

**Fig. S5** <sup>1</sup>H NMR spectrum of PEI-3 in DMSO-d<sub>6</sub>.

**Fig. S6** <sup>1</sup>H NMR spectrum of compound 4, PEI 25 kDa, in DMSO-d<sub>6</sub>.

**Fig. S7** <sup>1</sup>H NMR spectrum of PEI-5 in DMSO-d<sub>6</sub>.

**Fig. S8** Photographs of PEI-3 and PEI-5 solutions/dispersions in solvents of different polarity under daylight (left) and 365 nm UV irradiation (right).

**Fig. S9** TEM images of PEI-3 and PEI-5 powders.

**Fig. S10** b-value analysis plots of PEI-3 and PEI-5 electrodes obtained from the relationship between log(i) and log(v) at selected potentials.

**Fig. S11** (a) CV curves of the PEI-3 symmetric supercapacitor device recorded at 100 mV s<sup>-1</sup> over different potential windows and (b) GCD profiles recorded at different potential windows at a current density of 1 A g<sup>-1</sup>.

**Fig. S12** Coulombic efficiency of the PEI-3 symmetric supercapacitor device at different current densities.

**Table S1** Qualitative solubility and colour changes of PEI-3 and PEI-5 in various organic solvents.

**Table S2** Absorption intensity ratios of PEI-3 and PEI-5 in different solvents.

**Table S3** Maximum absorption wavelength  $\lambda_{\text{max}}$  (nm), half-width  $\Delta\bar{\nu}_{1/2}$  (cm<sup>-1</sup>), fluorescence quantum yield  $\Phi_f$ , and singlet energy  $E_s$  (kcal mol<sup>-1</sup>) data of PEI-3 and PEI-5 in different organic solvents

**Table S4** Comparison of the electrochemical performance of the PEI–perylene symmetric supercapacitor device with previously reported perylene/PDI-based supercapacitor systems.

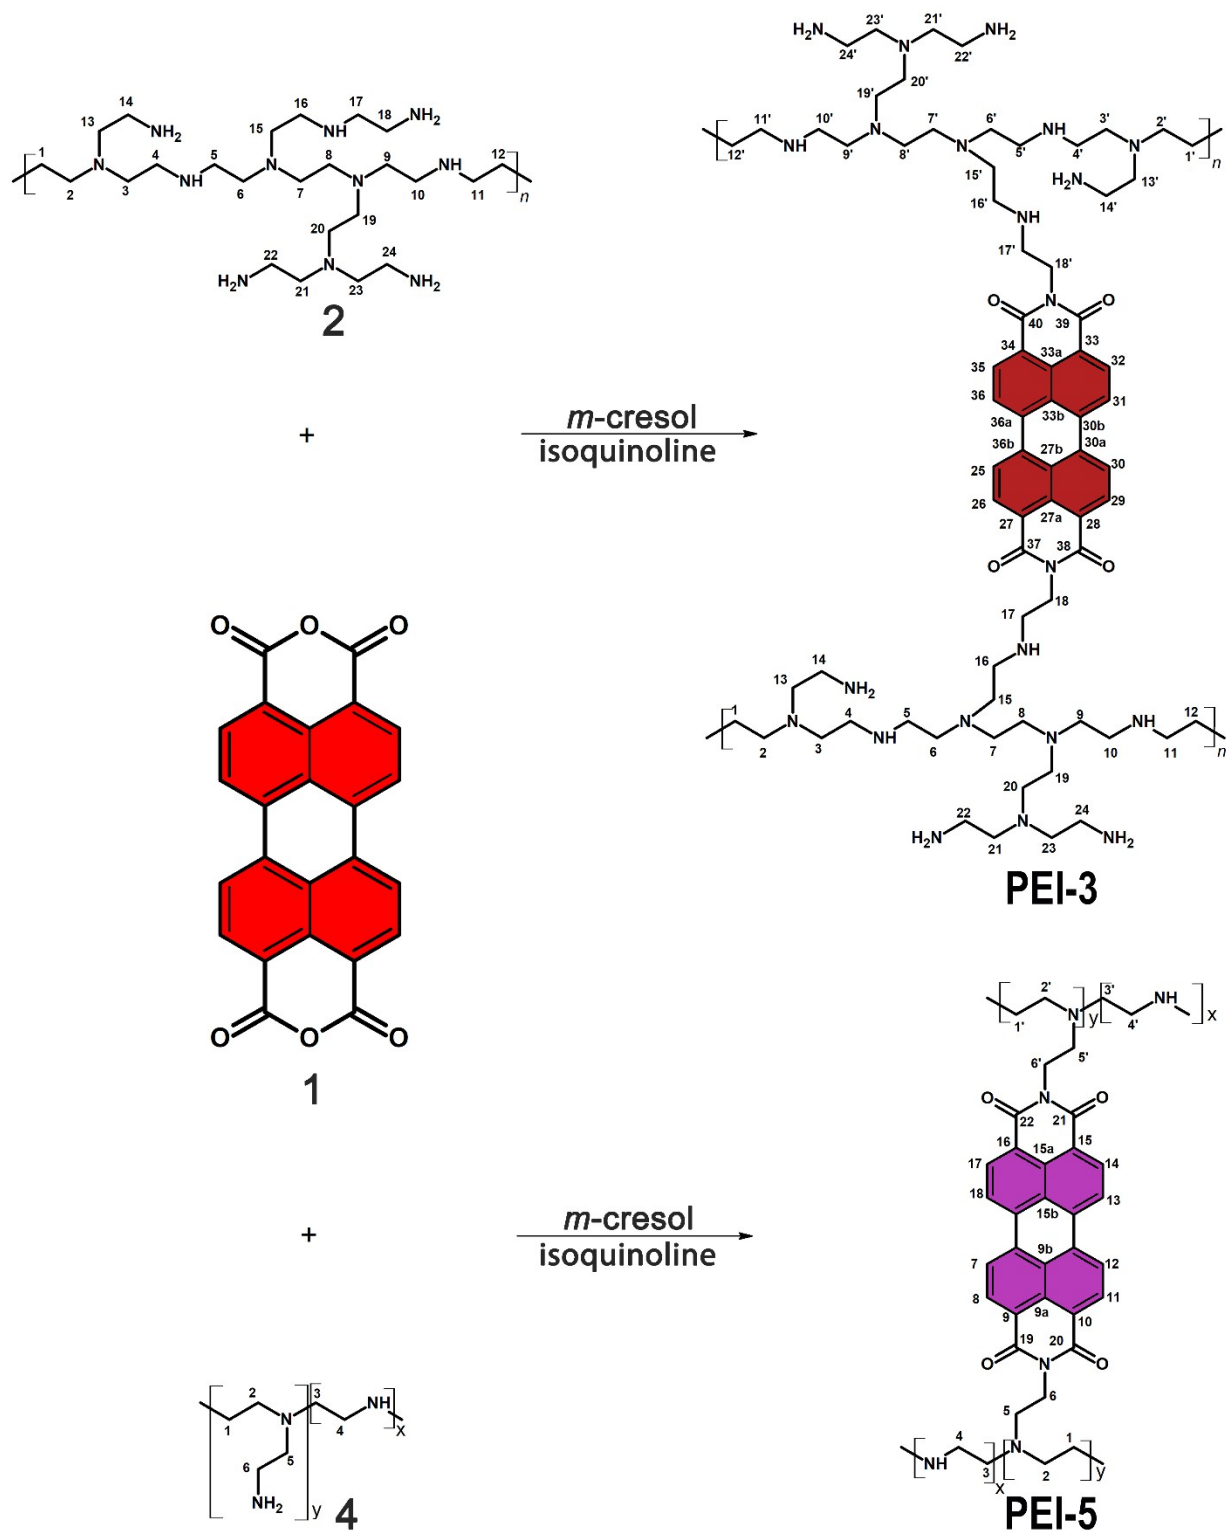

**Fig. S1** Synthetic pathway for the preparation of PEI-3 and PEI-5.

**Table S1** Qualitative solubility and colour changes of PEI-3 and PEI-5 in various organic solvents.

| Solvent                         | PEI-3              | PEI-5              |
|---------------------------------|--------------------|--------------------|
| CHL <sup>b</sup>                | (+-)/ purple       | (+-)/ purple       |
| EtOAc <sup>c</sup>              | (-)                | (-)                |
| AcOH <sup>d</sup>               | (+-)/ dark red     | (+-)/ dark purple  |
| THF <sup>e</sup>                | (-)                | (-)                |
| TCE <sup>f</sup>                | (+-)/ light purple | (+-)/ light purple |
| TFAc <sup>g</sup>               | (+-)/ dark red     | (+-)/ dark purple  |
| DCM <sup>h</sup>                | (-)                | (-)                |
| PYR <sup>i</sup>                | (+-)/ light purple | (+-)/ light purple |
| IPA <sup>j</sup>                | (+-)/ light purple | (+-)/ light purple |
| ACE <sup>k</sup>                | (-)                | (-)                |
| EtOH <sup>l</sup>               | (-)                | (-)                |
| NMP <sup>m</sup>                | (+-)/ bordeaux     | (+-)/ purple       |
| MeOH <sup>n</sup>               | (-)                | (-)                |
| DMF <sup>o</sup>                | (+-)/ pink         | (+-)/ purple       |
| CH <sub>3</sub> CN <sup>p</sup> | (-)                | (-)                |
| DMAc <sup>r</sup>               | (+-)/ pink         | (+-)/ purple       |
| DMSO <sup>s</sup>               | (+-)/ bordeaux     | (+-)/ purple       |
| H <sub>2</sub> O <sup>t</sup>   | (-)                | (-)                |

<sup>a</sup>Measured at a concentration of 1 mg mL<sup>-1</sup> in solvents at 25 °C. (++) : soluble; (+-) : partially soluble (0.2 – 0.7 mg ml<sup>-1</sup>); (-) : insoluble.

<sup>b</sup>CHL: Chloroform.

<sup>c</sup>EtOAc: Ethyl acetate.

<sup>d</sup>AcOH: Acetic acid

<sup>e</sup>THF: Tetrahydrofuran.

<sup>f</sup>TCE: 1,1,2,2- tetrachloroethane.

<sup>g</sup>TFAc: Tetrafluoroacetic acid.

<sup>h</sup>DCM: Dichloromethane.

<sup>i</sup>PYR: Pyridine.

<sup>j</sup>IPA: Isopropanol.

<sup>k</sup>Ace: Acetone.

<sup>l</sup>EtOH: Ethanol

<sup>m</sup>NMP: *N*-methyl-2-pyrrolidinone.

<sup>n</sup>MeOH: Methanol

<sup>o</sup>DMF: *N,N*-dimethylformamide.

<sup>p</sup>CH<sub>3</sub>CN: Acetonitrile.

<sup>r</sup>DMAc: *N,N*-dimethylacetamide.

<sup>s</sup>DMSO: Dimethyl sulfoxide.

<sup>t</sup>H<sub>2</sub>O: Water.

**Table S2** Absorption intensity ratios of PEI-3 and PEI-5 in different solvents.

| Solvent | $A^{0\rightarrow 0}$ |       | $A^{0\rightarrow 1}$ |       | $A^{0\rightarrow 0}/A^{0\rightarrow 1}$ |       |
|---------|----------------------|-------|----------------------|-------|-----------------------------------------|-------|
|         | PEI-3                | PEI-5 | PEI-3                | PEI-5 | PEI-3                                   | PEI-5 |
| AcOH    | 1.46                 | 0.74  | 1.32                 | 0.59  | 1.11                                    | 1.25  |
| NMP     | 1.31                 | 0.72  | 1.16                 | 0.55  | 1.13                                    | 1.31  |
| DMF     | 1.12                 | 0.62  | 0.94                 | 0.44  | 1.19                                    | 1.41  |
| DMAc    | 0.63                 | 0.21  | 0.54                 | 0.15  | 1.17                                    | 1.4   |
| DMSO    | 1.42                 | 0.084 | 1.32                 | 0.06  | 1.08                                    | 1.4   |

**Table S3** Maximum absorption wavelength  $\lambda_{max}$  (nm), half-width  $\Delta\bar{\nu}_{1/2}$  (cm<sup>-1</sup>), fluorescence quantum yield  $\Phi_f$ , and singlet energy  $E_s$  (kcal mol<sup>-1</sup>) data of PEI-3 and PEI-5 in different organic solvents

| Compound | Solvent | $\lambda_{max}$ | $\Delta\bar{\nu}_{1/2}$ | $\Phi_f$ | $E_s$ |
|----------|---------|-----------------|-------------------------|----------|-------|
| PEI-3    | AcOH    | 526             | 1673.32                 | -        | 54.37 |
|          | NMP     | 525             | 1559.73                 | 0.24     | 54.48 |
|          | DMF     | 524             | 1425.06                 | 0.32     | 54.58 |
|          | DMAc    | 524             | 1758.09                 | -        | 54.58 |
|          | DMSO    | 526             | 1646.90                 | -        | 54.37 |
| PEI-5    | AcAc    | 525             | 1920.12                 | -        | 54.48 |
|          | NMP     | 525             | 1632.54                 | 0.15     | 54.48 |
|          | DMF     | 524             | 1537.97                 | 0.28     | 54.58 |
|          | DMAc    | 524             | 1571.69                 | -        | 54.58 |
|          | DMSO    | 526             | 1559.73                 | -        | 54.37 |

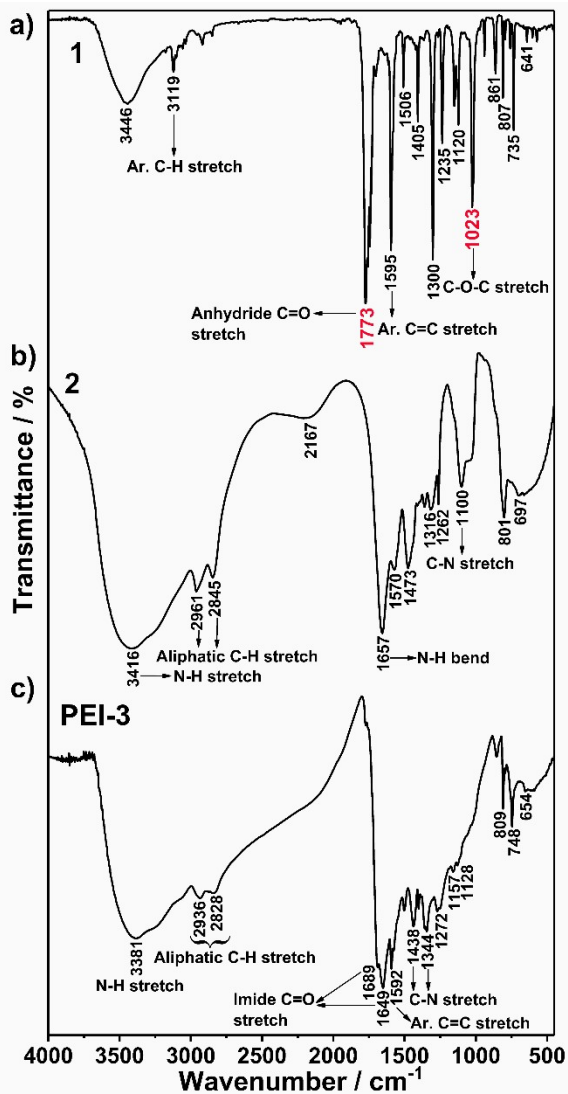

**Fig. S2** FTIR spectra of (a) compound 1, perylene-3,4,9,10-tetracarboxylic dianhydride (PDA), (b) compound 2, PEI 60 kDa, and (c) PEI-3, the perylene-cross-linked PEI 60 kDa network.

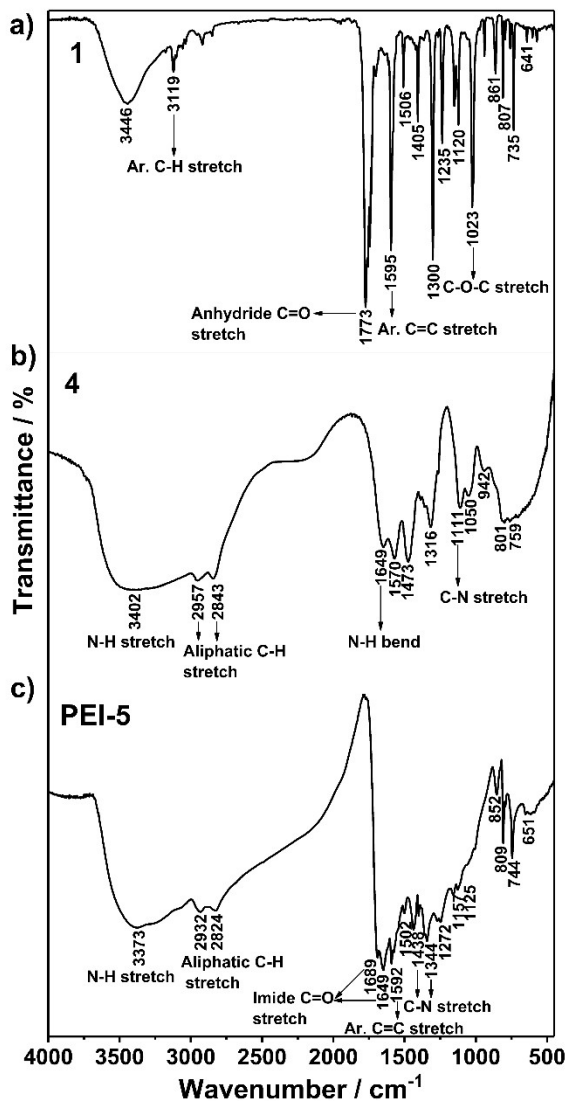

**Fig. S3** FTIR spectra of (a) compound 1, perylene-3,4,9,10-tetracarboxylic dianhydride (PDA), (b) compound 4, PEI 25 kDa, and (c) PEI-5, the perylene-cross-linked PEI 25 kDa network.

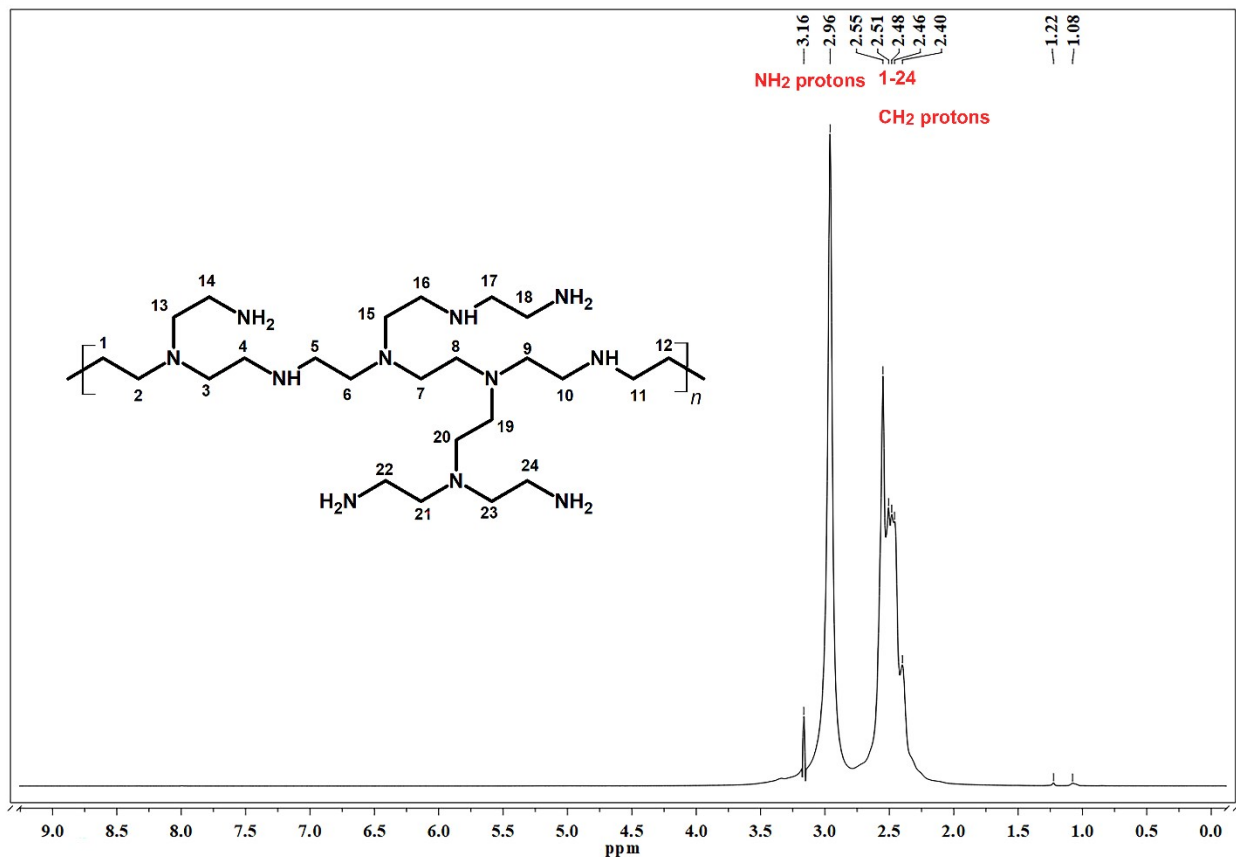

**Fig. S4**  $^1\text{H}$  NMR spectrum of compound 2, PEI 60 kDa, in  $\text{DMSO-d}_6$ .

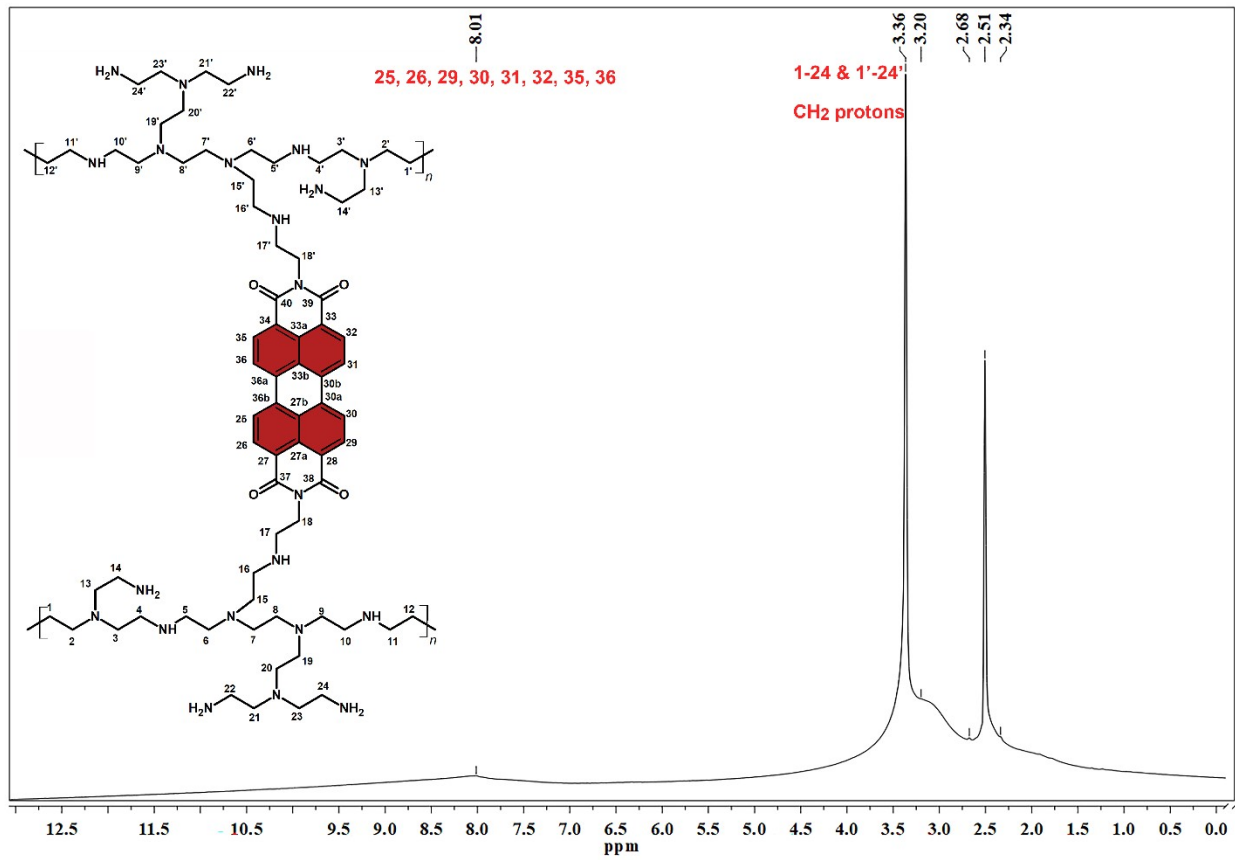

**Fig. S5** <sup>1</sup>H NMR spectrum of PEI-3 in DMSO-d<sub>6</sub>.

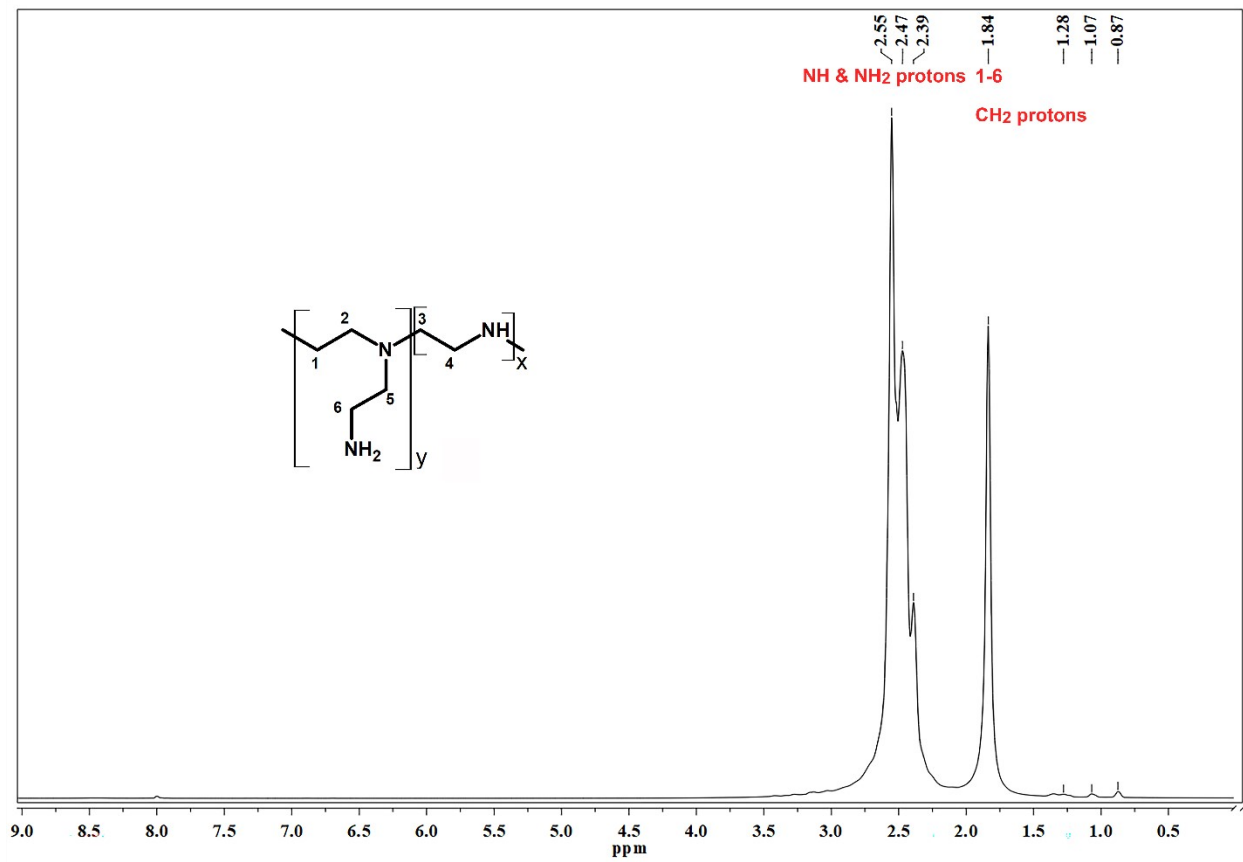

**Fig. S6**  $^1\text{H}$  NMR spectrum of compound 4, PEI 25 kDa, in  $\text{DMSO-d}_6$ .

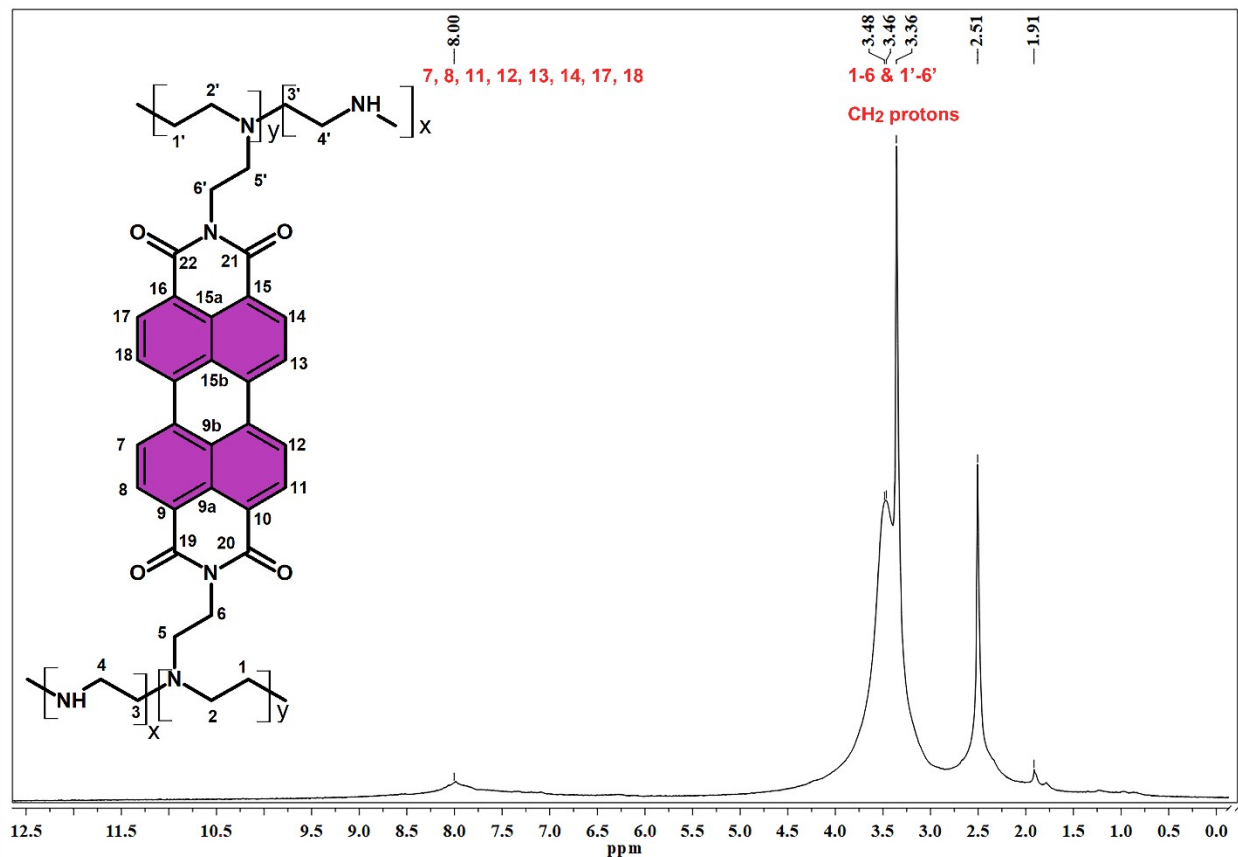

**Fig. S7**  $^1\text{H}$  NMR spectrum of PEI-5 in  $\text{DMSO-d}_6$ .

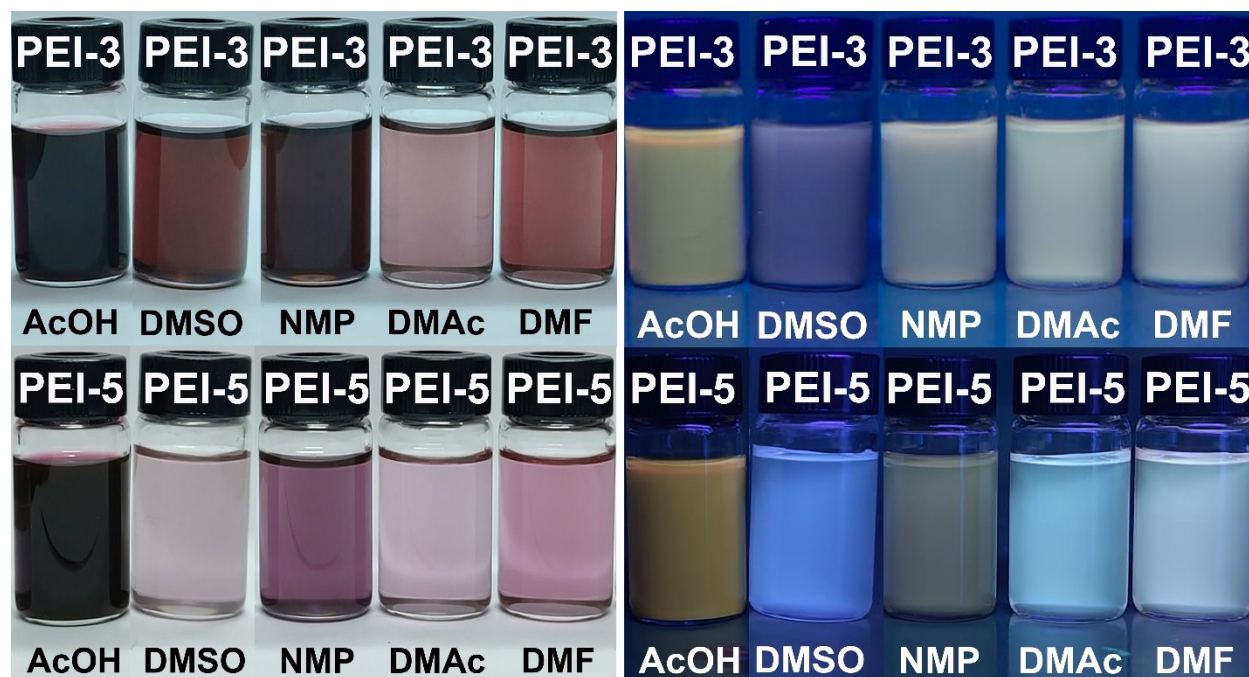

**Fig. S8** Photographs of PEI-3 and PEI-5 solutions/dispersions in solvents of different polarity under daylight (left) and 365 nm UV irradiation (right).

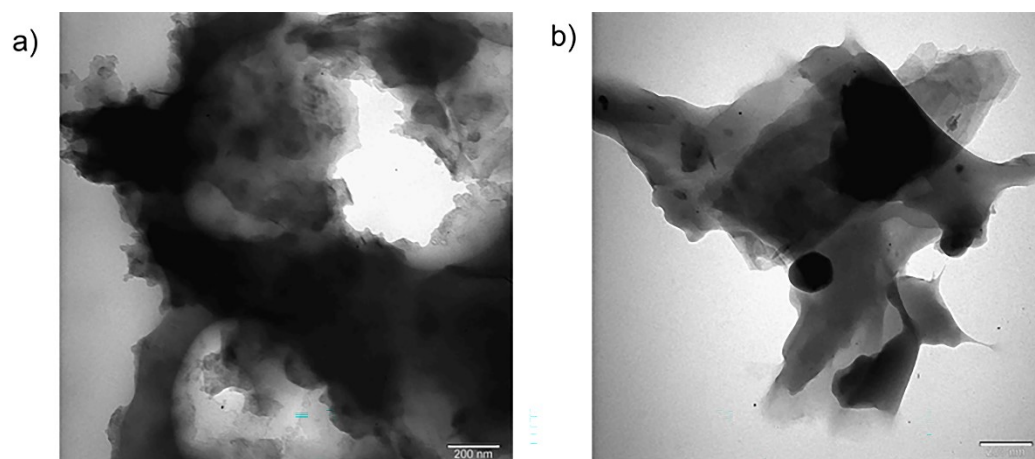

**Fig. S9** TEM images of PEI-3 and PEI-5 powders.

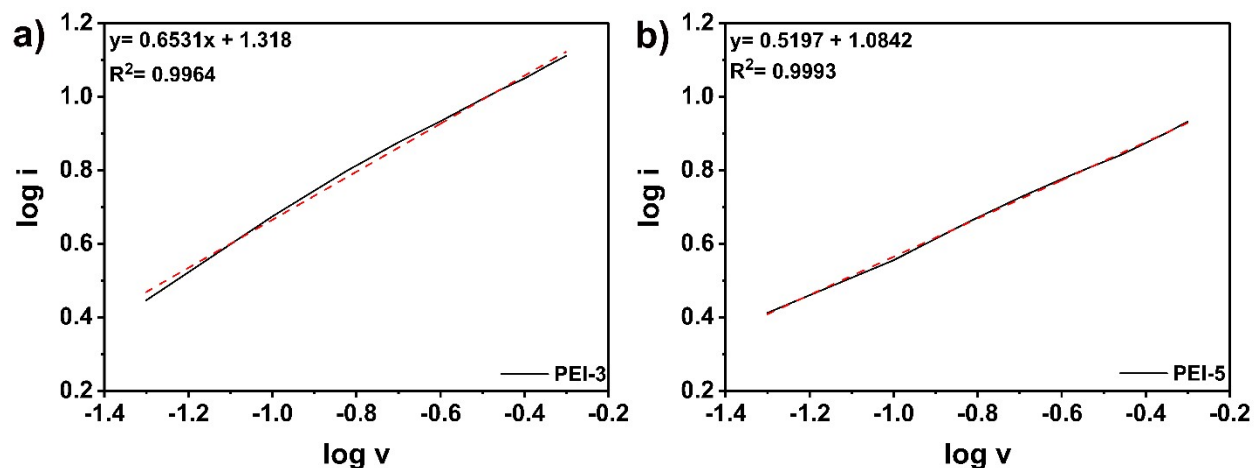

**Fig. S10** b-value analysis plots of PEI-3 and PEI-5 electrodes obtained from the relationship between  $\log(i)$  and  $\log(v)$  at selected potentials.

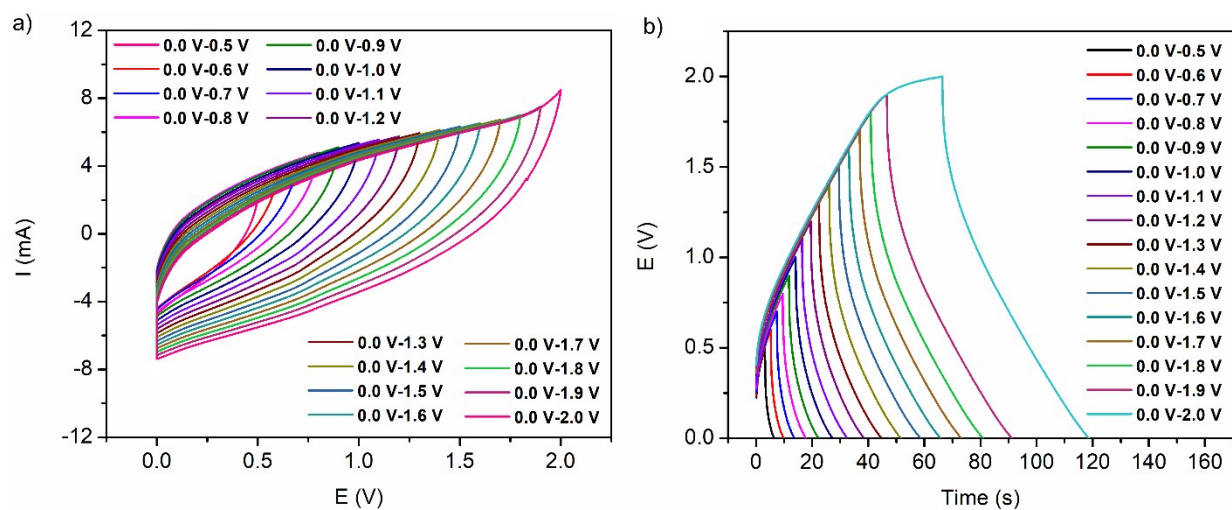

**Fig. S11** (a) CV curves of the PEI-3 symmetric supercapacitor device recorded at  $100 \text{ mV s}^{-1}$  over different potential windows and (b) GCD profiles recorded at different potential windows at a current density of  $1 \text{ A g}^{-1}$ .

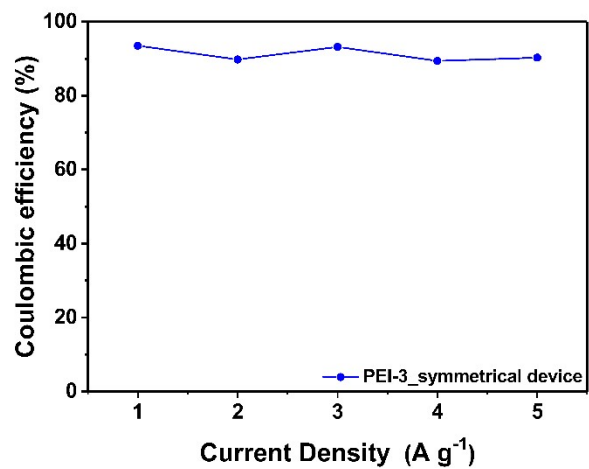

**Fig. S12** Coulombic efficiency of the PEI-3 symmetric supercapacitor device at different current densities.

**Table S4** Comparison of the electrochemical performance of the PEI–perylene symmetric supercapacitor device with previously reported perylene/PDI-based supercapacitor systems.

|                                   |                             |                             |                                       |                                                                                                             |
|-----------------------------------|-----------------------------|-----------------------------|---------------------------------------|-------------------------------------------------------------------------------------------------------------|
| PPAC/PDI-1//PPAC                  | 0.5 A g <sup>-1</sup>       | 617 F g <sup>-1</sup>       | 1 M H <sub>2</sub> SO <sub>4</sub>    | <a href="https://doi.org/10.1016/j.est.2022.106058">https://doi.org/10.1016/j.est.2022.106058</a>           |
| PDI-Pyr/GF//PDI-Pyr/GF            | 1 A g <sup>-1</sup>         | 92 F g <sup>-1</sup>        | 1 M H <sub>2</sub> SO <sub>4</sub>    | <a href="https://doi.org/10.1016/j.ceja.2023.100499">https://doi.org/10.1016/j.ceja.2023.100499</a>         |
| PDI-PDA-rGO/rGO ASC               | 1 A g <sup>-1</sup>         | 310 F g <sup>-1</sup>       | 1M Na <sub>2</sub> SO <sub>4</sub>    | <a href="https://doi.org/10.1002/cssc.202000440">https://doi.org/10.1002/cssc.202000440</a>                 |
| PDI-Py/GF//PDI-Py/GF              | 1 A g <sup>-1</sup>         | 128 F g <sup>-1</sup>       | 1 M H <sub>2</sub> SO <sub>4</sub>    | <a href="https://doi.org/10.1002/ente.202200154">https://doi.org/10.1002/ente.202200154</a>                 |
| PEDOT/PDI film                    | 0.5 A g <sup>-1</sup>       | 78.6 F g <sup>-1</sup>      | 0.1 M TBAPF6 gel electrolyte          | <a href="https://doi.org/10.1021/acsapm.0c00905">https://doi.org/10.1021/acsapm.0c00905</a>                 |
| 2-AP PDI based cell               | 1 A g <sup>-1</sup>         | 41.56 F g <sup>-1</sup>     | 1M H <sub>2</sub> SO <sub>4</sub>     | <a href="https://doi.org/10.1016/j.jpowsour.2025.236781">https://doi.org/10.1016/j.jpowsour.2025.236781</a> |
| Cell 5                            | 0.01A g <sup>-1</sup>       | 61.95 F g <sup>-1</sup>     | 1 M H <sub>3</sub> PO <sub>4</sub>    | <a href="https://doi.org/10.1021/acsaelm.4c02164">https://doi.org/10.1021/acsaelm.4c02164</a>               |
| PDI-NDI-PDI /GF// PDI-NDI-PDI /GF | 0.5 A g <sup>-1</sup>       | 193.33 F g <sup>-1</sup>    | 1M H <sub>2</sub> SO <sub>4</sub>     | <a href="https://doi.org/10.1016/j.est.2024.111874">https://doi.org/10.1016/j.est.2024.111874</a>           |
| NH-PDI                            | 0.5 A g <sup>-1</sup>       | 134.2 F g <sup>-1</sup>     | 1M H <sub>2</sub> SO <sub>4</sub>     | <a href="https://doi.org/10.1039/D4TA06278G">https://doi.org/10.1039/D4TA06278G</a>                         |
| <b>PEI-3_symmetrical device</b>   | <b>1.0 A g<sup>-1</sup></b> | <b>107 F g<sup>-1</sup></b> | <b>1M H<sub>2</sub>SO<sub>4</sub></b> | <b>This work</b>                                                                                            |
